# Supplementary material for: Remote ischemic conditioning counteracts the intestinal damage of necrotizing enterocolitis by improving intestinal microcirculation
Source: PubMed Central journal article supplement (PMC7532542; doi:10.1038/s41467-020-18750-9), 2020-10-02
Supplement: 41467_2020_18750_MOESM3_ESM.pdf [file 41467_2020_18750_MOESM3_ESM.pdf]

**Title: Supplementary Video 1.**

**Description:** Assessment of intestinal perfusion at P9 in breastfed control pups using Doppler ultrasound.

**Title: Supplementary Video 2.**

**Description:** Assessment of intestinal perfusion at P9 in NEC pups using Doppler ultrasound revealed reduced perfusion following NEC induction, compared to breastfed control.

**Title: Supplementary Video 3.**

**Description:** Conditioning with Stage 1 RIC during experimental NEC revealed remarkable improvement in intestinal wall perfusion, assessed by Doppler ultrasound.

**Title: Supplementary Video 4.**

**Description:** Conditioning with Stage 2 RIC during experimental NEC revealed remarkable improvement in intestinal wall perfusion, assessed by Doppler ultrasound.

**Title: Supplementary Video 5.**

**Description:** Microcirculatory perfusion in the submucosa of the intestine at P9 in Rosa<sup>GFP</sup> breastfed control pups, recorded using TPLSM. Recording depicts arterioles in the submucosa.

**Title: Supplementary Video 6.**

**Description:** Microcirculatory perfusion in the submucosa of the intestine at P9 in Rosa<sup>GFP</sup> NEC pups, recorded using TPLSM. NEC induction resulted in decreased diameter and blood velocity of submucosal arterioles.

**Title: Supplementary Video 7.**

**Description:** Microcirculatory perfusion in the submucosa of the intestine at P9 in Rosa<sup>GFP</sup> NEC pups conditioned with Stage 1 RIC, recorded using TPLSM. Conditioning with Stage 1 RIC resulted in remarkable preservation of the diameter and blood velocity of submucosal arterioles.

**Title: Supplementary Video 8.**

**Description:** Microcirculatory perfusion in the submucosa of the intestine at P9 in Rosa<sup>GFP</sup> NEC pups conditioned with Stage 2 RIC, recorded using TPLSM. Conditioning with Stage 2 RIC resulted in remarkable preservation of the diameter and blood velocity of submucosal arterioles.

**Title: Supplementary Video 9.**

**Description:** Necrosis in the intestinal epithelium in Rosa<sup>mT/mG/+</sup>;Tie2-Cre breastfed control pups at P9 detected by Sytox Green staining.

**Title: Supplementary Video 10.**

**Description:** Necrosis in the intestinal epithelium in Rosa<sup>mT/mG/+</sup>;Tie2-Cre NEC pups at

P9 detected by Sytox Green staining. Necrosis of enterocytes was increased following NEC induction, especially at the villi tip.

**Title: Supplementary Video 11.**

**Description:** Necrosis in the intestinal epithelium in Rosa<sup>mT/mG/+</sup>;Tie2-Cre NEC pups conditioned with Stage 1 RIC at P9 detected by Sytox Green staining. Following conditioning with Stage 1 RIC, necrosis of enterocytes at the villi tip was remarkably reduced.

**Title: Supplementary Video 12.**

**Description:** Necrosis in the intestinal epithelium in Rosa<sup>mT/mG/+</sup>;Tie2-Cre NEC pups conditioned with Stage 2 RIC at P9 detected by Sytox Green staining. Following conditioning with Stage 2 RIC, necrosis of enterocytes at the villi tip was remarkably reduced.

**Title: Supplementary Video 13.**

**Description:** Assessment of intestinal perfusion at P9 in NEC pups receiving Stage 1 RIC and treatment with H<sub>2</sub>S-synthesizing enzyme inhibitors using Doppler ultrasound. The RIC-mediated preservation of intestinal perfusion during NEC was abolished following inhibition of H<sub>2</sub>S synthesis.

**Title: Supplementary Video 14.**

**Description:** Assessment of intestinal perfusion at P9 in NEC pups receiving Stage 2 RIC and treatment with H<sub>2</sub>S-synthesizing enzyme inhibitors using Doppler ultrasound. The RIC-mediated preservation of intestinal perfusion during NEC was abolished following inhibition of H<sub>2</sub>S synthesis.

**Title: Supplementary Video 15.**

**Description:** TPLSM assessment of microcirculatory perfusion in the submucosa of the intestine at P9 in Rosa<sup>GFP</sup> NEC pups conditioned with Stage 1 RIC and treated with H<sub>2</sub>S-synthesizing enzyme inhibitors. The RIC-mediated enhancement of blood velocity in submucosal arterioles during NEC was abolished following inhibition of H<sub>2</sub>S synthesis.

**Title: Supplementary Video 16.**

**Description:** TPLSM assessment of microcirculatory perfusion in the submucosa of the intestine at P9 in Rosa<sup>GFP</sup> NEC pups conditioned with Stage 2 RIC and treated with H<sub>2</sub>S-synthesizing enzyme inhibitors. The RIC-mediated enhancement of blood velocity in submucosal arterioles during NEC was abolished following inhibition of H<sub>2</sub>S synthesis.

**Title: Supplementary Video 17.**

**Description:** Surface righting test of breastfed control pups.

**Title: Supplementary Video 18.**

**Description:** Surface righting test of breastfed control pup conditioned with Stage 1 RIC revealed no alterations due to conditioning with RIC.

**Title: Supplementary Video 19.**

**Description:** Surface righting test of breastfed control pups conditioned with Stage 2 RIC revealed no alterations due to conditioning with RIC.
